# Supplementary material for: Mutational spectrum of adult T-ALL
Source: PubMed Central journal article supplement (PMC4413615; doi:10.18632/oncotarget.2218), 2014-07-15
Supplement: oncotarget-06-2754-s001.pdf [file oncotarget-06-2754-s001.pdf]

# Mutational spectrum of adult T-ALL

## Supplementary Information

### Supplementary Table S1: Immunophenotype of adult T-ALL patients.

(Numbers are percentage of positive cells)

| ID   | CD7 | CD5 | CD2 | CD1 | CYCD3 | CD3 | CD4 | CD8 | CD33 | CD13 | CD34 | CD117 |
|------|-----|-----|-----|-----|-------|-----|-----|-----|------|------|------|-------|
| TE1  | 96  | 29  | 3   | 0   | 76    | 3   | 2   | 3   | 77   | 3    | 88   | 4     |
| TE2  | 96  | 97  | 71  | 66  | 94    | 89  | 25  | 80  | 1    | 1    | 1    | 1     |
| TE3  | 96  | 96  | 99  | 25  | 97    | 93  | 42  | 41  | 0    | 1    | 0    | 0     |
| TE4  | 98  | 98  | 98  | 65  | 35    | 7   | 64  | 97  | 2    | 2    | 12   | 0     |
| TE5  | 97  | 98  | 98  | 93  | 93    | 81  | 95  | 95  | 7    | 4    | 2    | 1     |
| TE6  | 98  | 99  | 97  | 98  | 95    | 1   | 97  | 97  | 0    | 1    | 0    | 0     |
| TE7  | 98  | 98  | 9   | 71  | 98    | 97  | 83  | 92  | 2    | 1    | 93   | 0     |
| TE8  | 94  | 94  | 78  | 9   | 98    | 82  | 7   | 72  | 1    | 33   | 10   | 12    |
| TE9  | 98  | 92  | 92  | 94  | 87    | 1   | 17  | 96  | 0    | 1    | 0    | 0     |
| TE10 | 94  | 94  | 95  | 77  | 93    | 13  | 83  | 84  | 2    | 2    | 0    | 0     |
| TE11 | 96  | 96  | 95  | 91  | 76    | 8   | 90  | 2   | 1    | 4    | 2    | 1     |
| TE12 | 98  | 94  | 11  | 59  | 99    | 52  | 2   | 16  | 0    | 7    | 4    | 0     |
| TE13 | 95  | 81  | 40  | 20  | 96    | 10  | 12  | 8   | 39   | 30   | 46   | 1     |
| TE14 | 99  | 98  | 98  | 4   | 98    | 73  | 5   | 49  | 10   | 1    | 62   | 0     |
| TE15 | 97  | 96  | 97  | 88  | 94    | 95  | 70  | 89  | 0    | 3    | 0    | 0     |
| TE16 | 96  | 96  | 93  | 3   | 72    | 19  | 3   | 21  | 4    | 9    | 7    | 1     |
| TE17 | 89  | 99  | 99  | 10  | 97    | 84  | 66  | 81  | 1    | 1    | 52   | 0     |
| TE18 | 96  | 99  | 99  | 96  | 99    | 79  | 86  | 99  | 0    | 1    | 0    | 0     |
| TE19 | 98  | 96  | 97  | 82  | 98    | 78  | 83  | 95  | 3    | 7    | 7    | 1     |
| TE20 | 90  | 4   | 98  | 0   | 40    | 5   | 3   | 2   | 1    | 66   | 59   | 80    |
| TE21 | 98  | 99  | 50  | 99  | 96    | 1   | 39  | 97  | 0    | 1    | 0    | 0     |
| TE22 | 98  | 98  | 98  | 97  | 82    | 3   | 88  | 98  | 1    | 1    | 0    | 0     |
| TE23 | 95  | 99  | 97  | 85  | 97    | 2   | 67  | 86  | 0    | 1    | 1    | 0     |
| TE24 | 97  | 99  | 97  | 60  | 91    | 83  | 67  | 87  | 1    | 1    | 90   | 0     |
| TE25 | 98  | 99  | 97  | 98  | 94    | 1   | 91  | 93  | 0    | 1    | 0    | 0     |
| TE26 | 92  | 95  | 98  | 77  | 95    | 3   | 68  | 94  | 2    | 3    | 1    | 0     |
| TE27 | 94  | 93  | 92  | 80  | 59    | 14  | 88  | 58  | 2    | 3    | 1    | 0     |
| TE28 | 75  | 93  | 79  | 90  | 86    | 50  | 69  | 30  | 1    | 1    | 0    | 0     |
| TE29 | 87  | 86  | 88  | 78  | 97    | 8   | 60  | 87  | 7    | 8    | 1    | 1     |
| TE30 | 99  | 98  | 98  | 4   | 98    | 73  | 5   | 49  | 1    | 10   | 62   | 0     |
| TE31 | 89  | 99  | 1   | 43  | 95    | 0   | 4   | 15  | 2    | 45   | 9    | 9     |
| TE32 | 91  | 85  | 5   | 1   | 85    | 4   | 4   | 4   | 6    | 3    | 0    | 0     |
| TE33 | 93  | 29  | 84  | 1   | 86    | 2   | 2   | 2   | 10   | 2    | 16   | 1     |
| TE34 | 97  | 90  | 96  | 41  | 80    | 3   | 38  | 92  | 1    | 1    | 1    | 0     |
| TE35 | 89  | 2   | 89  | 80  | 88    | 13  | 84  | 85  | 3    | 4    | 12   | 1     |
| TE36 | 96  | 94  | 99  | 95  | 92    | 88  | 23  | 96  | 1    | 1    | 0    | 0     |
| TE37 | 94  | 86  | 98  | 39  | 98    | 22  | 18  | 82  | 2    | 4    | 1    | 0     |
| TE38 | 96  | 52  | 60  | 3   | 97    | 24  | 5   | 51  | 32   | 16   | 11   | 10    |
| TE39 | 98  | 90  | 55  | 1   | 80    | 2   | 1   | 58  | 2    | 82   | 70   | 1     |
| TE40 | 95  | 95  | 4   | 90  | 85    | 42  | 92  | 87  | 0    | 1    | 1    | 5     |
| TE41 | 99  | 99  | 20  | 98  | 97    | 92  | 55  | 79  | 8    | 1    | 0    | 1     |
| TE42 | 88  | 3   | 95  | 0   | 88    | 3   | 1   | 1   | 16   | 56   | 57   | 74    |
| TE43 | 99  | 4   | 1   | 0   | 88    | 1   | 1   | 1   | 95   | 16   | 97   | 44    |
| TE44 | 89  | 93  | 33  | 4   | 81    | 14  | 10  | 21  | 93   | 13   | 79   | 4     |
| TE45 | 99  | 98  | 97  | 30  | 93    | 8   | 64  | 90  | 2    | 1    | 57   | 0     |
| TE46 | 90  | 86  | 26  | 0   | 86    | 27  | 14  | 16  | 54   | 2    | 3    | 0     |
| TE47 | 95  | 95  | 7   | 72  | 92    | 4   | 94  | 78  | 3    | 3    | 2    | 68    |
| TE48 | 86  | 89  | 81  | 34  | 61    | 5   | 38  | 72  | 12   | 13   | 6    | 3     |
| TE49 | 98  | 97  | 99  | 10  | 97    | 59  | 5   | 66  | 0    | 40   | 52   | 0     |
| TE50 | 96  | 95  | 97  | 50  | 78    | 39  | 56  | 91  | 1    | 2    | 0    | 0     |
| TE51 | 96  | 30  | 6   | 0   | 47    | 5   | 6   | 9   | 89   | 1    | 2    | 47    |
| TE52 | 91  | 85  | 24  | 34  | 87    | 10  | 15  | 16  | 2    | 3    | 23   | 1     |
| TE53 | 95  | 15  | 6   | 0   | 76    | 6   | 4   | 3   | 39   | 4    | 76   | 0     |
| TE54 | 89  | 73  | 91  | 11  | 79    | 76  | 33  | 64  | 11   | 39   | 3    | 7     |
| TE55 | 95  | 78  | 93  | 83  | 95    | 1   | 28  | 95  | 0    | 0    | 0    | 0     |
| TE56 | 91  | 97  | 91  | 97  | 93    | 2   | 24  | 18  | 0    | 1    | 0    | 0     |
| TE57 | 82  | 58  | 94  | 25  | 84    | 10  | 3   | 52  | 2    | 1    | 0    | 0     |
| TE58 | 91  | 83  | 2   | 0   | 82    | 1   | 1   | 1   | 9    | 1    | 0    | 0     |
| TE59 | 96  | 15  | 2   | 1   | 52    | 0   | 0   | 0   | 1    | 0    | 13   | 0     |
| TE60 | 96  | 97  | 99  | 88  | 98    | 78  | 84  | 95  | 1    | 1    | 1    | 0     |
| TE61 | 97  | 6   | 0   | 0   | 88    | 75  | 1   | 1   | 3    | 0    | 61   | 0     |
| TE62 | 96  | 94  | 96  | 43  | 68    | 13  | 89  | 71  | 2    | 3    | 1    | 1     |
| TE63 | 85  | 92  | 5   | 1   | 81    | 5   | 3   | 57  | 53   | 55   | 46   | 1     |
| TE64 | 97  | 97  | 93  | 94  | 95    | 11  | 22  | 96  | 4    | 6    | 32   | 2     |
| TE65 | 94  | 84  | 93  | 1   | 90    | 11  | 6   | 8   | 12   | 56   | 11   | 41    |
| TE66 | 98  | 24  | 4   | 4   | 88    | 4   | 2   | 2   | 3    | 48   | 1    | 4     |
| TE67 | 87  | 36  | 74  | 3   | 94    | 69  | 71  | 3   | 3    | 1    | 2    | 0     |
| TE68 | 71  | 2   | 19  | 1   | 48    | 2   | 2   | 2   | 8    | 47   | 82   | 42    |
| TE69 | 99  | 49  | 81  | 0   | 93    | 2   | 2   | 3   | 44   | 0    | 82   | 3     |
| TE70 | 82  | 3   | 87  | 1   | 87    | 1   | 1   | 1   | 1    | 31   | 52   | 85    |
| TE71 | 74  | 3   | 5   | 0   | 95    | 4   | 4   | 2   | 95   | 53   | 92   | 62    |
| TE72 | 95  | 5   | 3   | 1   | 78    | 3   | 2   | 2   | 0    | 71   | 90   | 89    |
| TE73 | 98  | 66  | 4   | 0   | 82    | 3   | 2   | 3   | 80   | 0    | 68   | 1     |
| TE74 | 97  | 6   | 0   | 0   | 88    | 75  | 1   | 1   | 3    | 0    | 61   | 0     |
| TE75 | 98  | 28  | 3   | 0   | 70    | 3   | 2   | 0   | 95   | 0    | 22   | 0     |
| TE76 | 89  | 2   | 93  | 1   | 83    | 2   | 1   | 1   | 3    | 27   | 14   | 44    |
| TE77 | 93  | 9   | 3   | 2   | 69    | 4   | 5   | 3   | 5    | 5    | 3    | 42    |
| TE78 | 97  | 42  | 99  | 1   | 84    | 4   | 3   | 2   | 9    | 68   | 0    | 3     |
| TE79 | 91  | 12  | 31  | 4   | 85    | 6   | 3   | 4   | 7    | 52   | 55   | 1     |
| TE80 | 72  | 6   | 71  | 0   | 34    | 3   | 2   | 1   | 0    | 95   | 91   | 0     |
| TE81 | 74  | 13  | 90  | 0   | 54    | 4   | 4   | 2   | 15   | 20   | 96   | 63    |

**Supplementary Table S2: Selected genes according to their annotated pathway.** Selection is described in Materials and Methods.

| <b>Pathway</b>              | <b>Gene (sequence length in bp)</b>                                                                                                                                                                                                                                                                                |
|-----------------------------|--------------------------------------------------------------------------------------------------------------------------------------------------------------------------------------------------------------------------------------------------------------------------------------------------------------------|
| <b>DNA methylation</b>      | DNMT3A (4380), TET2 (9233), IDH1 (2382), IDH2 (2694)                                                                                                                                                                                                                                                               |
| <b>DNA repair</b>           | MSH2 (3307), FRAP1 (8677), HERC1 (15196), PRKCZ (2326), PIK3C2B (7686)                                                                                                                                                                                                                                             |
| <b>JAK/STAT pathway</b>     | IL-7RA (4626), JAK1 (5047), JAK2 (5285), JAK3 (3996)                                                                                                                                                                                                                                                               |
| <b>MAPK signaling</b>       | NRAS (4449), KRAS (5765), TP53 (2579), BRAF (2480)                                                                                                                                                                                                                                                                 |
| <b>Methyltransferase</b>    | MLL2 (19419), WHSC1 (8568)                                                                                                                                                                                                                                                                                         |
| <b>NOTCH signaling</b>      | NOTCH1 (9371), FBXW7 (3734), NOTCH2 (11389), NOTCH3 (8070), NOTCH4 (6745), DLL1 (3174), DLL3 (2380), DLL4 (3383), CREBBP (10798), JAG1 (5901), JAG2 (5835), HES1 (1578), DTX1 (3455)                                                                                                                               |
| <b>PIK3A/AKT pathway</b>    | AKT1 (2866), AKT2 (5300), AKT3 (5127), PIK3CA (9093), PIK3C2B (7686)                                                                                                                                                                                                                                               |
| <b>PRC</b>                  | BMI1 (3428), EZH2 (2466), EP300 (9585), SUZ12 (4472), EED (2223)                                                                                                                                                                                                                                                   |
| <b>Tyrosine kinases</b>     | FLT3 (3842), KIT (5186), ABL1 (5766)                                                                                                                                                                                                                                                                               |
| <b>Spliceosome</b>          | U2AF35 (962), ZRSR2 (1491), SRSF2 (2845), SF3A1 (3510), SF3B1 (4336), PRPF40B (3154), U2AF65 (3130), SF1 (3094)                                                                                                                                                                                                    |
| <b>Transcription factor</b> | MEF2C (4079), BCL11B (7559), RUNX1 (7274), WT1 (3122), ERG (4919), GATA1 (1497), GATA2 (3367), GATA3 (3078), ETV6 (2211), DNMT2 (3654)                                                                                                                                                                             |
| <b>WNT pathway</b>          | FAT1 (14786), FAT3 (18474), LEF1 (3068)                                                                                                                                                                                                                                                                            |
| <b>Others</b>               | PTEN (9027), CDKN2A (12218), ASXL1 (7031), CB2 (5254), CEBPa (2631), KDM6A (5438), CBL (10257), BAALC (2831), IGFBP7 (1427), MYC (2345), ICAM-1 (3246), DICER1 (10277), PHF6 (4489), IKZF1 (6189), CTNNA3 (3232), SH2B3 (5406), GFI1 (2855), BCOR (6358), RELN (11571), ECT2L (4319), HNRNPA1 (4121), ERAP2 (5705) |

**Supplementary Table S3: Sequencing results for each patient.**

|        | # of total reads: | # of sequenced bases mapped to genome: | % of bases mapped in HQ reads: | % of target sequenced: | min 10x coverage: | % of target sequenced min 20x coverage: | mean target coverage: | % bases on or near target: | # of mutations |
|--------|-------------------|----------------------------------------|--------------------------------|------------------------|-------------------|-----------------------------------------|-----------------------|----------------------------|----------------|
| TE1    | 2,045,753         | 159,298,509                            | 98.8                           | 93.3                   | 82.7              | 80.0                                    | 131.3                 | 31.7                       | 4              |
| TE2    | 1,832,324         | 139,967,208                            | 98.1                           | 93.5                   | 82.6              | 79.3                                    | 117.9                 | 33.9                       | 5              |
| TE3    | 894,884           | 64,715,854                             | 96.1                           | 93.0                   | 77.0              | 65.8                                    | 42.4                  | 26.1                       | 4              |
| TE4    | 431,948           | 31,860,464                             | 97.0                           | 92.9                   | 75.7              | 64.6                                    | 35.3                  | 42.8                       | 22             |
| TE5    | 557,987           | 41,024,608                             | 96.9                           | 93.0                   | 77.8              | 67.4                                    | 40.6                  | 38.7                       | 31             |
| TE6    | 684,663           | 51,865,125                             | 97.8                           | 93.0                   | 79.9              | 74.9                                    | 63.7                  | 45.6                       | 20             |
| TE7    | 1,449,898         | 111,590,905                            | 98.8                           | 93.6                   | 83.5              | 81.5                                    | 144.2                 | 51.0                       | 3              |
| TE8    | 1,255,877         | 95,713,588                             | 98.8                           | 93.6                   | 83.9              | 82.0                                    | 130.8                 | 57.8                       | 2              |
| TE9    | 1,427,375         | 109,859,986                            | 99.0                           | 93.7                   | 83.9              | 82.2                                    | 155.5                 | 58.4                       | 3              |
| TE10   | 2,039,327         | 158,201,114                            | 99.0                           | 93.8                   | 84.4              | 83.2                                    | 227.2                 | 56.1                       | 2              |
| TE11   | 1,203,429         | 90,947,520                             | 98.7                           | 93.6                   | 83.7              | 81.5                                    | 124.0                 | 58.9                       | 4              |
| TE12   | 1,034,614         | 75,365,488                             | 97.4                           | 93.4                   | 82.9              | 79.5                                    | 87.9                  | 49.0                       | 6              |
| TE13   | 1,156,668         | 83,413,871                             | 97.4                           | 93.3                   | 83.0              | 79.9                                    | 97.9                  | 49.1                       | 2              |
| TE14   | 925,543           | 69,363,991                             | 98.3                           | 93.1                   | 81.7              | 78.6                                    | 89.1                  | 49.8                       | 3              |
| TE15   | 1,714,059         | 132,689,620                            | 99.0                           | 93.5                   | 83.7              | 82.2                                    | 190.5                 | 56.2                       | 5              |
| TE16   | 1,509,019         | 115,965,391                            | 99.0                           | 93.4                   | 83.6              | 81.7                                    | 153.9                 | 53.3                       | 2              |
| TE17   | 1,288,221         | 96,650,746                             | 98.5                           | 93.3                   | 83.1              | 81.1                                    | 130.9                 | 53.9                       | 3              |
| TE18   | 1,668,937         | 129,149,002                            | 99.0                           | 93.6                   | 83.6              | 82.1                                    | 186.2                 | 56.0                       | 6              |
| TE19   | 1,175,362         | 87,662,622                             | 98.7                           | 93.5                   | 82.4              | 79.8                                    | 108.5                 | 54.6                       | 8              |
| TE20   | 2,102,967         | 158,288,170                            | 98.1                           | 93.6                   | 83.9              | 82.5                                    | 214.1                 | 58.1                       | 3              |
| TE21   | 775,628           | 57,936,692                             | 97.8                           | 93.0                   | 79.7              | 70.0                                    | 72.6                  | 53.3                       | 3              |
| TE22   | 1,379,518         | 105,875,229                            | 98.3                           | 93.3                   | 82.7              | 81.2                                    | 121.3                 | 47.4                       | 3              |
| TE23   | 1,742,516         | 135,314,096                            | 99.0                           | 93.7                   | 84.0              | 82.6                                    | 165.8                 | 48.7                       | 5              |
| TE24   | 892,434           | 66,227,168                             | 98.1                           | 93.5                   | 82.5              | 79.1                                    | 66.1                  | 46.8                       | 5              |
| TE25   | 2,180,384         | 166,875,004                            | 98.4                           | 93.4                   | 83.1              | 81.9                                    | 190.8                 | 48.0                       | 10             |
| TE26   | 973,722           | 71,650,660                             | 96.7                           | 93.2                   | 81.4              | 76.5                                    | 64.3                  | 38.8                       | 3              |
| TE27   | 1,112,210         | 82,016,677                             | 97.9                           | 93.5                   | 83.4              | 81.0                                    | 89.4                  | 50.1                       | 2              |
| TE28   | 882,373           | 64,365,539                             | 97.8                           | 93.4                   | 82.3              | 79.1                                    | 74.3                  | 52.9                       | 2              |
| TE29   | 852,041           | 62,647,512                             | 97.8                           | 93.2                   | 81.8              | 77.0                                    | 87.5                  | 55.6                       | 8              |
| TE30   | 1,343,011         | 98,975,171                             | 97.5                           | 93.5                   | 83.8              | 81.9                                    | 118.1                 | 51.2                       | 5              |
| TE31   | 1,034,327         | 75,849,270                             | 98.0                           | 93.4                   | 82.9              | 80.2                                    | 88.6                  | 53.7                       | 1              |
| TE32   | 1,213,604         | 90,791,805                             | 98.2                           | 93.2                   | 83.8              | 82.0                                    | 128.0                 | 57.3                       | 4              |
| TE33   | 1,713,217         | 126,501,751                            | 97.7                           | 93.8                   | 84.0              | 82.4                                    | 155.2                 | 51.1                       | 6              |
| TE34   | 896,772           | 64,787,634                             | 97.3                           | 93.3                   | 82.4              | 79.2                                    | 79.7                  | 52.3                       | 2              |
| TE35   | 1,675,609         | 125,989,726                            | 97.5                           | 93.9                   | 84.2              | 82.5                                    | 107.1                 | 38.5                       | 8              |
| TE36   | 1,697,055         | 125,254,162                            | 98.0                           | 93.4                   | 83.8              | 82.1                                    | 169.0                 | 57.0                       | 4              |
| TE37   | 1,096,139         | 78,795,131                             | 96.6                           | 93.2                   | 81.2              | 76.5                                    | 79.8                  | 44.3                       | 2              |
| TE38   | 1,403,658         | 102,668,960                            | 97.9                           | 93.5                   | 83.8              | 82.0                                    | 134.5                 | 52.7                       | 4              |
| TE39   | 1,160,904         | 84,122,948                             | 97.8                           | 93.5                   | 83.3              | 80.8                                    | 105.4                 | 51.6                       | 8              |
| TE40   | 1,036,558         | 75,371,150                             | 97.8                           | 93.2                   | 82.2              | 79.5                                    | 94.3                  | 55.4                       | 4              |
| TE41   | 767,433           | 57,253,762                             | 98.5                           | 93.5                   | 81.5              | 77.2                                    | 63.4                  | 48.9                       | 8              |
| TE42   | 1,312,643         | 97,920,658                             | 98.5                           | 93.3                   | 83.4              | 81.5                                    | 144.3                 | 58.2                       | 3              |
| TE43   | 1,349,752         | 101,408,187                            | 98.5                           | 93.5                   | 82.9              | 80.9                                    | 142.8                 | 54.7                       | 1              |
| TE44   | 1,408,447         | 106,803,166                            | 98.8                           | 93.4                   | 83.7              | 81.7                                    | 169.2                 | 60.8                       | 5              |
| TE45   | 887,904           | 63,864,706                             | 97.0                           | 93.2                   | 80.6              | 76.2                                    | 72.9                  | 48.2                       | 2              |
| TE46   | 1,145,051         | 84,329,972                             | 98.0                           | 93.5                   | 82.4              | 79.4                                    | 91.1                  | 43.0                       | 6              |
| TE47   | 809,493           | 59,086,770                             | 97.8                           | 93.2                   | 81.1              | 75.5                                    | 70.1                  | 49.0                       | 4              |
| TE48   | 1,279,162         | 93,025,958                             | 96.8                           | 93.4                   | 82.4              | 79.2                                    | 83.6                  | 38.4                       | 2              |
| TE49   | 839,676           | 60,356,033                             | 98.2                           | 93.0                   | 79.6              | 74.2                                    | 63.3                  | 44.5                       | 4              |
| TE50   | 1,227,260         | 90,708,396                             | 98.5                           | 93.7                   | 82.4              | 80.0                                    | 95.6                  | 45.3                       | 4              |
| TE51   | 872,686           | 62,510,041                             | 98.5                           | 93.2                   | 79.0              | 72.8                                    | 70.2                  | 48.3                       | 1              |
| TE52   | 1,338,833         | 100,489,669                            | 97.0                           | 93.6                   | 82.6              | 78.6                                    | 75.7                  | 32.3                       | 7              |
| TE53   | 972,261           | 72,175,042                             | 97.6                           | 93.5                   | 82.1              | 78.1                                    | 65.7                  | 42.5                       | 2              |
| TE54   | 1,921,389         | 142,176,047                            | 97.9                           | 93.7                   | 83.9              | 82.3                                    | 142.4                 | 43.5                       | 4              |
| TE55   | 706,567           | 52,080,425                             | 96.9                           | 93.2                   | 80.2              | 70.5                                    | 52.0                  | 42.3                       | 4              |
| TE56   | 1,322,526         | 99,566,801                             | 98.5                           | 93.5                   | 83.3              | 79.3                                    | 132.8                 | 56.8                       | 4              |
| TE57   | 1,009,170         | 72,470,031                             | 96.1                           | 93.2                   | 80.6              | 74.1                                    | 60.2                  | 35.3                       | 2              |
| TE58   | 1,207,946         | 91,745,654                             | 98.9                           | 93.5                   | 84.1              | 82.1                                    | 149.3                 | 67.7                       | 9              |
| TE59   | 1,018,383         | 75,209,252                             | 98.2                           | 93.5                   | 83.1              | 78.8                                    | 106.1                 | 62.6                       | 8              |
| TE60   | 645,529           | 49,434,468                             | 99.0                           | 93.2                   | 81.6              | 71.4                                    | 78.3                  | 66.0                       | 7              |
| TE61   | 448,886           | 34,342,922                             | 98.7                           | 93.1                   | 79.4              | 65.4                                    | 50.8                  | 60.7                       | 5              |
| TE62   | 1,030,986         | 79,313,634                             | 99.4                           | 93.7                   | 84.5              | 83.1                                    | 133.7                 | 73.1                       | 4              |
| TE63   | 1,283,251         | 99,450,751                             | 99.4                           | 93.3                   | 84.2              | 82.7                                    | 168.8                 | 68.6                       | 3              |
| TE64   | 2,427,564         | 188,860,380                            | 99.5                           | 93.5                   | 84.8              | 83.8                                    | 330.3                 | 69.6                       | 4              |
| TE65   | 609,015           | 46,798,734                             | 99.4                           | 93.2                   | 82.5              | 79.6                                    | 87.2                  | 75.8                       | 4              |
| TE66   | 811,097           | 62,297,334                             | 99.5                           | 93.5                   | 83.8              | 82.0                                    | 118.1                 | 78.8                       | 3              |
| TE67   | 579,487           | 44,093,889                             | 99.3                           | 93.2                   | 80.9              | 70.3                                    | 86.4                  | 79.8                       | 6              |
| TE68   | 759,765           | 55,696,015                             | 98.7                           | 93.3                   | 83.6              | 81.1                                    | 91.7                  | 70.3                       | 3              |
| TE69   | 932,698           | 68,412,234                             | 98.5                           | 93.4                   | 83.7              | 81.5                                    | 104.2                 | 64.9                       | 4              |
| TE70   | 734,833           | 54,103,729                             | 98.8                           | 93.5                   | 83.6              | 81.1                                    | 90.5                  | 74.1                       | 8              |
| TE71   | 890,031           | 64,673,202                             | 98.6                           | 93.3                   | 81.6              | 77.7                                    | 90.3                  | 67.0                       | 5              |
| TE72   | 1,481,825         | 110,076,129                            | 98.2                           | 93.5                   | 84.6              | 83.1                                    | 155.9                 | 59.8                       | 4              |
| TE73   | 966,305           | 71,310,575                             | 98.5                           | 93.3                   | 83.8              | 81.8                                    | 114.7                 | 66.9                       | 4              |
| TE74   | 1,141,746         | 88,019,727                             | 99.4                           | 93.4                   | 84.3              | 82.6                                    | 163.0                 | 76.4                       | 6              |
| TE75   | 625,161           | 45,713,633                             | 98.3                           | 93.3                   | 81.6              | 76.7                                    | 62.9                  | 63.2                       | 6              |
| TE76   | 696,727           | 50,803,562                             | 98.7                           | 93.1                   | 82.4              | 79.3                                    | 88.0                  | 68.2                       | 5              |
| TE77   | 1,558,686         | 116,636,060                            | 98.3                           | 93.4                   | 84.2              | 82.8                                    | 163.6                 | 57.8                       | 3              |
| TE78   | 963,936           | 73,472,392                             | 99.3                           | 93.2                   | 83.5              | 80.9                                    | 142.6                 | 77.0                       | 8              |
| TE79   | 2,146,597         | 166,617,273                            | 99.3                           | 93.4                   | 84.1              | 82.8                                    | 252.0                 | 57.8                       | 7              |
| TE80   | 2,768,317         | 203,188,308                            | 98.1                           | 93.6                   | 84.6              | 83.4                                    | 249.1                 | 49.8                       | 2              |
| TE81   | 6,139,294         | 480,817,719                            | 99.3                           | 94.2                   | 85.5              | 84.9                                    | 641.5                 | 53.7                       | 5              |
| Median | 1,145,051         | 84,122,948                             | 98.3                           | 93.4                   | 83.1              | 80.8                                    | 106.1                 | 53.7                       | 4              |

**Supplementary Table S4: All SNVs found in 96 T-ALL see file Supplementary Tables S4**

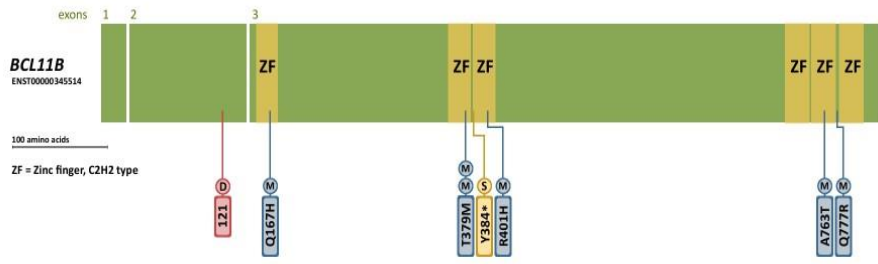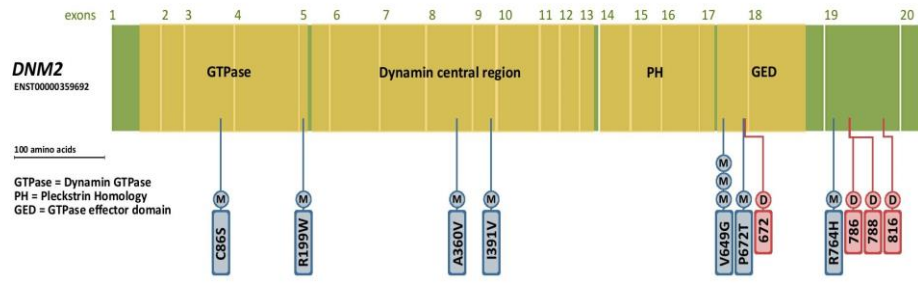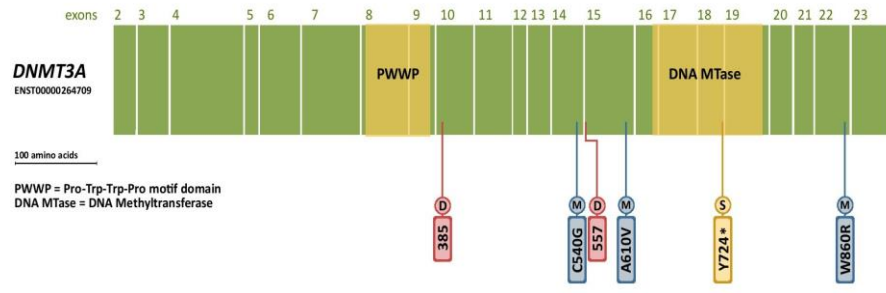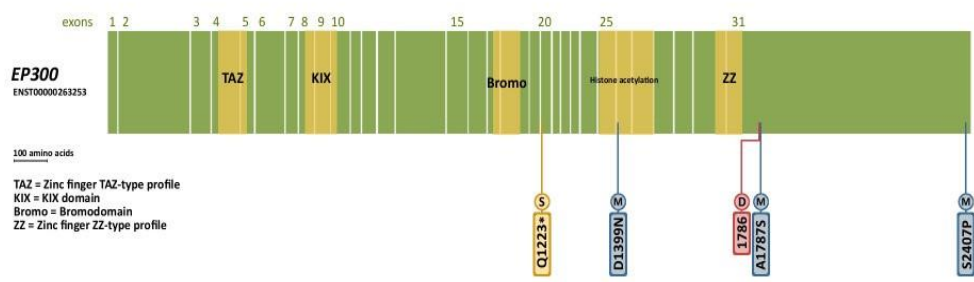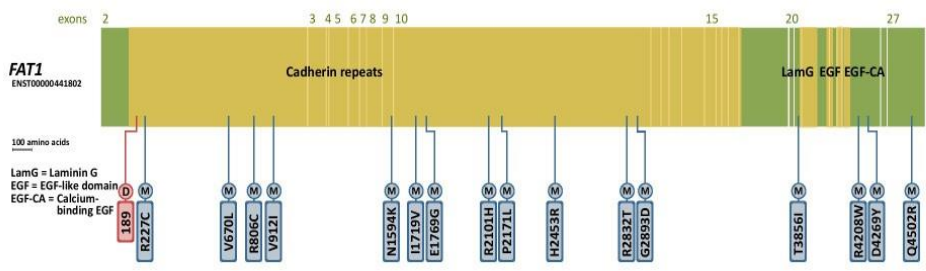

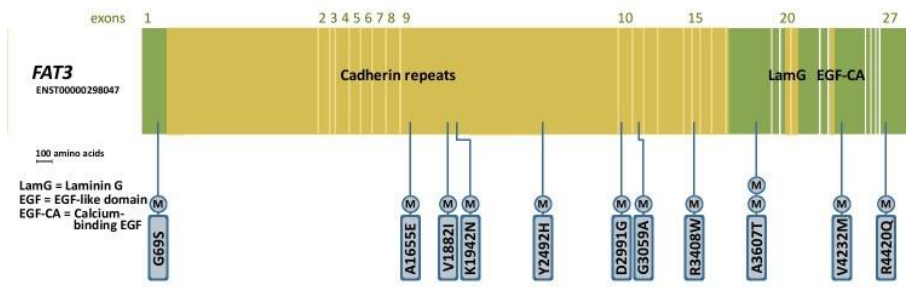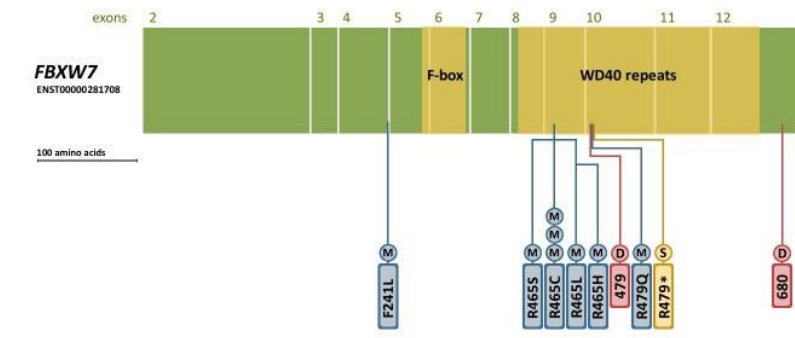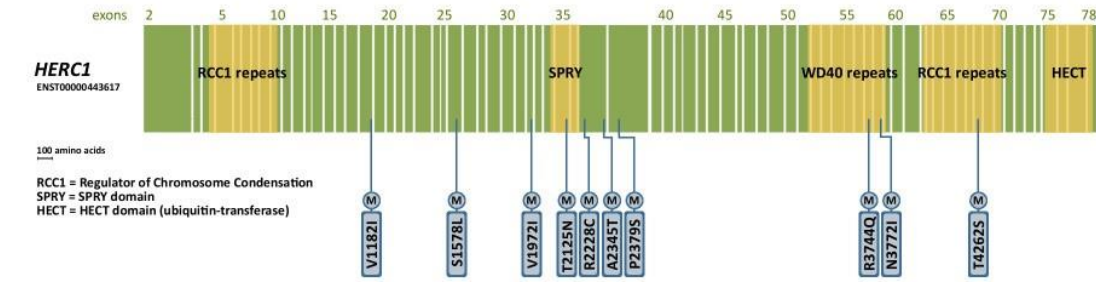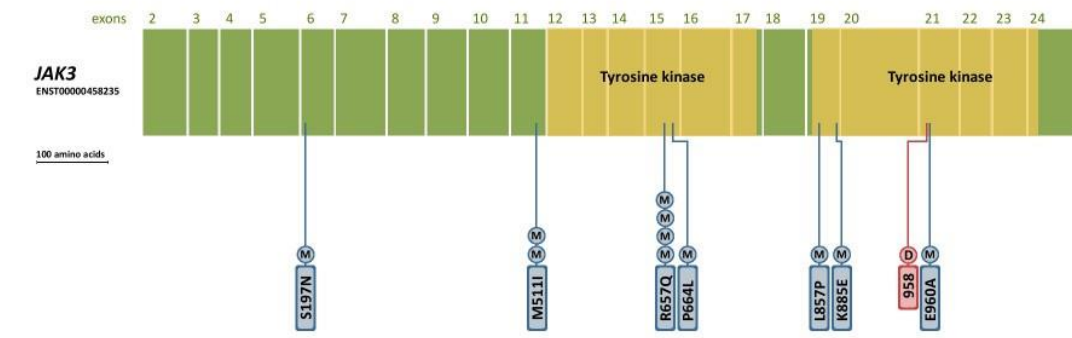

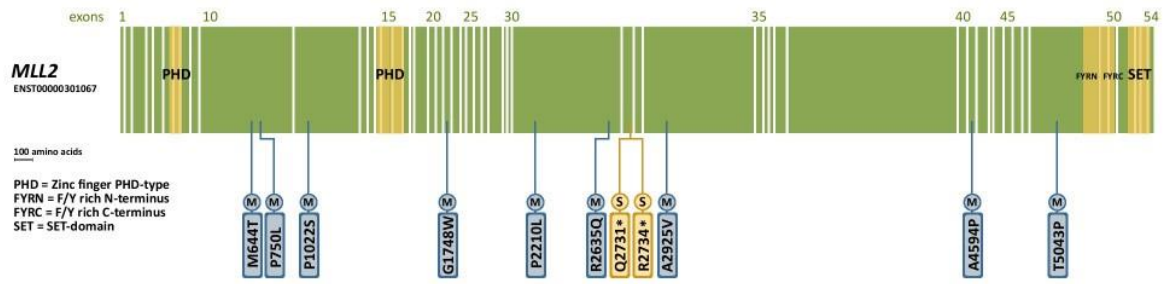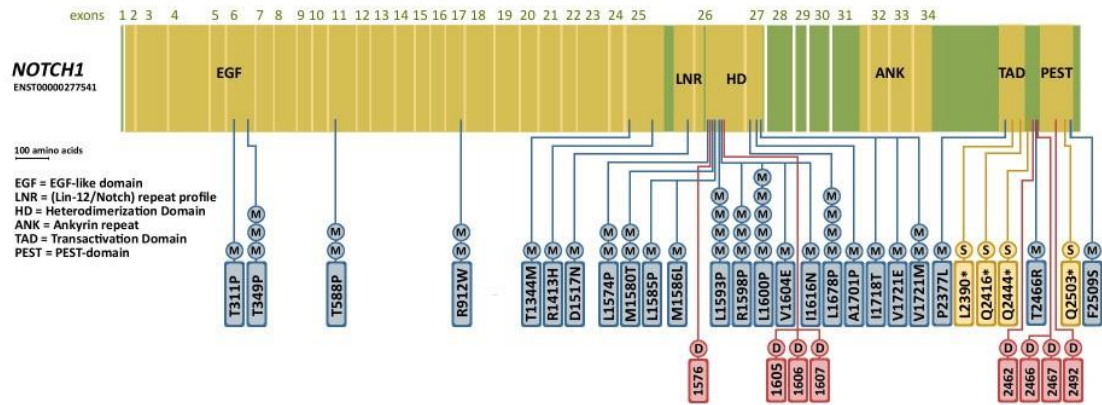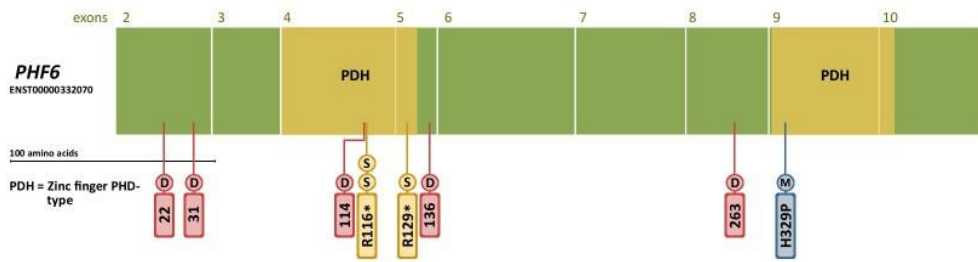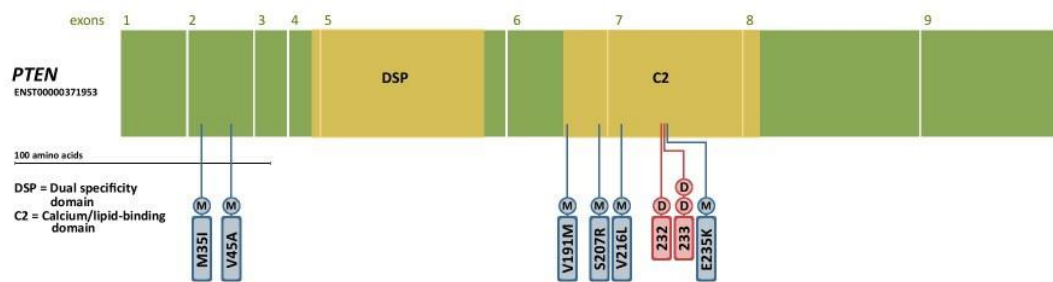

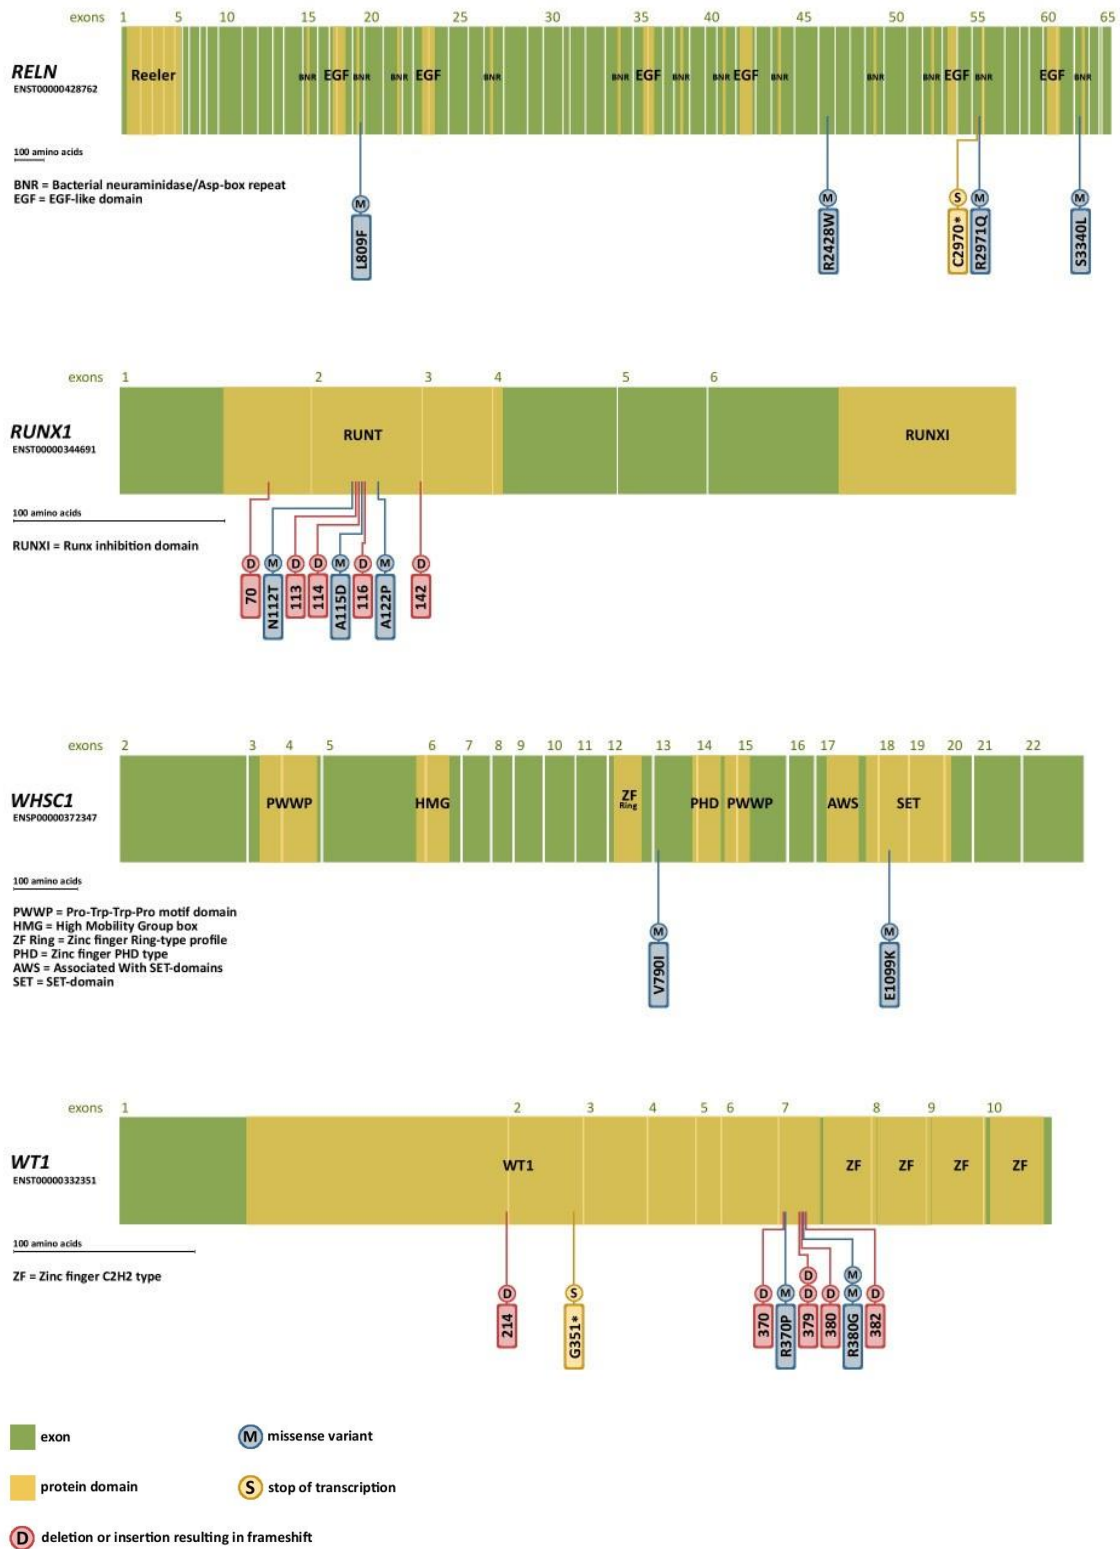

**Supplementary Figure S1: Protein domain plots.** Protein plots are shown for genes with at least five mutations in the 81 adult T-ALL patients.



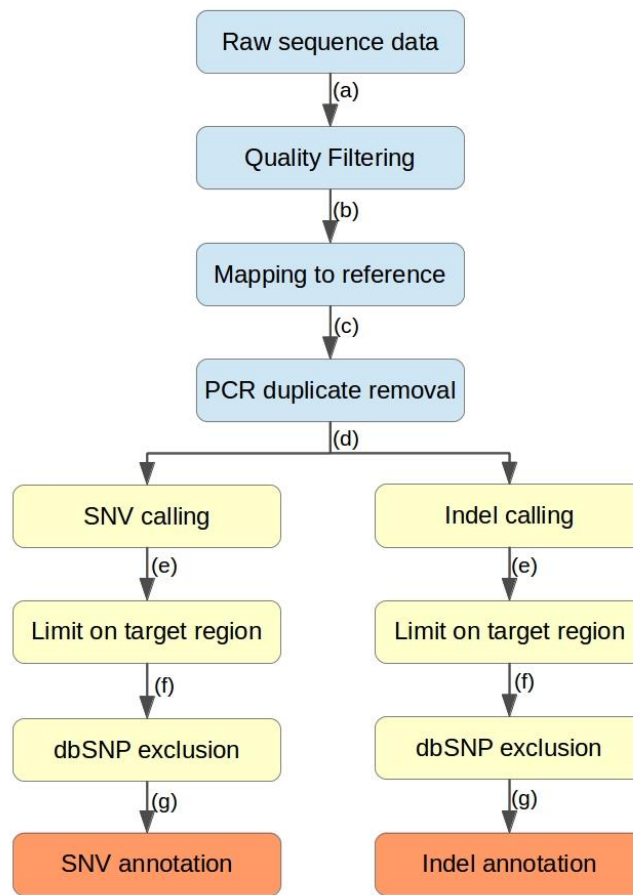

**Supplementary Figure S2: Workflow to identify recurrent somatic mutations in T-ALL .**

(a) Illumina chastity filter and read trimming, (b) read mapping to reference genome using BWA, (c) removing PCR duplicates using SAMtools, (d) variant calling using Varscan, (e) limit variants to target region, (f) remove known polymorphisms using dbSNP135, (g) annotate variants using SnpEff.

Abbreviations: SNV – single nucleotide variant; Indel – short insertion or deletion
